# Supplementary material for: Chromosome-scale pearl millet genomes reveal CLAMT1b as key determinant of strigolactone pattern and Striga susceptibility
Source: PubMed Central journal article supplement — Nat Commun. 2024 Aug 12;15:6906. doi: 10.1038/s41467-024-51189-w (PMC11319436; doi:10.1038/s41467-024-51189-w), 2024-08-12
Supplement: 41467_2024_51189_MOESM3_ESM.pdf [file 41467_2024_51189_MOESM3_ESM.pdf]

### **Description of Additional Supplementary Files**

File Name: Supplementary Data 1

Description: Candidate genes for affecting striga resistance as reported from GWAS experiments in sorghum, maize and pearl millet with the corresponding homologous genes identified in P10 and Aw.
